# Supplementary material for: Flexible power generators by Ag2Se thin films with record-high thermoelectric performance
Source: PubMed Central journal article supplement (PMC10830499; doi:10.1038/s41467-024-45092-7), 2024-01-31
Supplement: 41467_2024_45092_MOESM1_ESM.pdf [file 41467_2024_45092_MOESM1_ESM.pdf]

Supplementary information

## **Flexible power generators by Ag<sub>2</sub>Se thin films with record-high thermoelectric performance**

*Dong Yang,<sup>1,2,a</sup> Xiao-Lei Shi,<sup>3,a</sup> Meng Li,<sup>3</sup> Mohammad Nisar,<sup>1</sup> Adil Mansoor,<sup>1</sup> Shuo Chen,<sup>1</sup> Yuexing Chen,<sup>1</sup> Li Fu,<sup>1</sup> Hongli Ma,<sup>2</sup> Guang Xing Liang,<sup>1</sup> Xianghua Zhang,<sup>2</sup> Weidi Liu,<sup>3,4</sup> Ping Fan,<sup>1</sup> Zhuanghao Zheng,<sup>1,\*</sup> and Zhi-Gang Chen<sup>3,\*</sup>*

<sup>1</sup> Shenzhen Key Laboratory of Advanced Thin Films and Applications, Key Laboratory of Optoelectronic Devices and Systems of Ministry of Education and Guangdong Province, College of Physics and Optoelectronic Engineering, Shenzhen University, Shenzhen, Guangdong 518060, China;

<sup>2</sup> Univ Rennes, CNRS, ISCR (Institut des Sciences Chimiques de Rennes) UMR 6226, Rennes, F-35000, France;

<sup>3</sup> School of Chemistry and Physics, ARC Research Hub in Zero-emission Power Generation for Carbon Neutrality, and Centre for Materials Science, Queensland University of Technology, Brisbane, Queensland 4001, Australia;

<sup>4</sup> Australian Institute for Bioengineering and Nanotechnology, The University of Queensland, Brisbane, QLD 4072, Australia;

<sup>a</sup> These authors contribute equally to this work.

### **Corresponding Author**

\* Zhuanghao Zheng: zhengzh@szu.edu.cn;

\* Zhi-Gang Chen: zhigang.chen@qut.edu.au.

## 1. Supplementary Experimental details

***Thin film and device fabrication.*** Flexible Ag<sub>2</sub>Se thin films were deposited using the vacuum thermal co-evaporation method at various temperatures. High-purity Ag powders (99.99% purity, Aladdin) and Se-Te mixed powders (99.99% purity, Aladdin) were loaded into a vacuum deposition chamber using tantalum evaporator boats. A polyimide (PI) substrate measuring 20 mm × 20 mm × 2 mm was cleaned ultrasonically for 15 minutes consecutively in acetone, ethanol, and deionized water. The background pressure in the vacuum deposition chamber was maintained at  $5.4 \times 10^{-4}$  Pa. The silver source had an evaporating current of 130 A, while the selenium source stabilized at 40 A, with a concurrent deposition time of 15 minutes. The chemical composition of the samples was controlled by adjusting the mass ratio. All Ag and Se powders were evaporated after the preparation process. To address the issue of insufficient atomic energy during room temperature deposition, the substrate was heated to 353 K during deposition. The average film thickness was 350 nm. A single Ag<sub>2</sub>Se-Sb<sub>2</sub>Te<sub>3</sub> thermoelectric device was fabricated with a Cu electrode on a PI substrate. The legs had fixed dimensions of 20 mm × 4 mm. An organic coating material, polyvinyl laurate, was employed to enhance the flexibility of the as-fabricated Ag<sub>2</sub>Se thin films. First, the Ag<sub>2</sub>Se thin films were securely laid flat on glass. Second, an appropriate amount of polyvinyl-laurate-based polymers composed of 90% poly(vinyl laurate) and 10% N-methylpyrrolidone was applied to the thin films under vacuum conditions. The thin films were then placed in a centrifuge for 10 seconds with a rotation speed of 2000 r/s to ensure uniform coverage of the organic layer. Subsequently, the samples were heated to 95 °C for 2 minutes and exposed to ultraviolet light for 15 seconds.

***Characterizations and thermoelectric performance evaluation.*** X-ray diffraction (XRD) analysis was performed using a Rigaku Corporation D/max 2500 instrument with CuK $\alpha$  radiation over an angular

range of 20° to 60° in 0.02° increments to determine the crystal orientation of the Ag<sub>2</sub>Se samples. The preferred orientation information of the Ag<sub>2</sub>Se thin films was obtained through pole figure scans using a four-circle X-ray diffractometer (X'PERT, Philips). Morphological analysis, mapping, and composition assessment of the samples were conducted using a Zeiss Supra55 scanning electron microscope (SEM). An energy dispersive X-ray (EDS) detector from Bruker, known as the EDS QUANTAX, was used for EDS analysis. The electrical conductivity  $\sigma$  and Seebeck coefficient  $S$  were measured using a Seebeck coefficient and electrical conductivity apparatus (SBA458, Netzsch). The in-plane thermal conductivity  $\kappa$  of the thin film in this work, deposited on a commercial flat chip, was determined using the 3 $\omega$  method through a thin film comprehensive physical property analyzer (TFA-LINSES). Carrier concentration  $n$  and mobility  $\mu$  were investigated using a Van der Pauw Hall measuring instrument (HL5500 PC, Nanometrics). Contact resistivity  $\rho_c$  was measured using a 2400 series digital source meter.

**Preferred orientation factor calculation:** The orientation factor  $F$  was calculated by the equations

$F = \frac{P-P_0}{1-P_0}$ ,  $P = \frac{I(00l)}{\Sigma I(hkl)}$ , and  $P_0 = \frac{I_0(00l)}{\Sigma I_0(hkl)}$ , where  $I(00l)$  is the sum of the diffraction intensity of (00l) planes,  $\Sigma I(hkl)$  is the total intensity of all (hkl) diffraction peaks and  $P$  is the ratio of the intensity of (00l) plane in the measured data. The  $I_0(00l)$ ,  $\Sigma I_0(hkl)$ , and  $P_0$  represent the corresponding ones from the standard pattern.

**Single parabolic (SPB) model calculation:** We employed an SPB model to perform a simulation to understand our measured properties by using the following equations<sup>1-4</sup>:

$$S(\eta) = \frac{k_B}{e} \cdot \left[ \frac{\left(r+\frac{5}{2}\right) \cdot F_{r+\frac{3}{2}}(\eta)}{\left(r+\frac{3}{2}\right) \cdot F_{r+\frac{1}{2}}(\eta)} - \eta \right] \quad (1)$$

$$n_H = \frac{1}{e \cdot R_H} = \frac{(2m^* \cdot k_B T)^{\frac{3}{2}}}{3\pi^2 \hbar^3} \cdot \frac{\left(r+\frac{3}{2}\right)^2 \cdot F_{r+\frac{1}{2}}^2(\eta)}{\left(2r+\frac{3}{2}\right) \cdot F_{2r+\frac{1}{2}}(\eta)} \quad (2)$$

$$\mu_H = \left[ \frac{e\pi\hbar^4}{\sqrt{2}(k_B T)^{\frac{3}{2}}} \frac{C_1}{E_{def}^2 (m^*)^{\frac{5}{2}}} \right] \frac{(2r+\frac{3}{2}) \cdot F_{2r+\frac{1}{2}}(\eta)}{(r+\frac{3}{2})^2 \cdot F_{r+\frac{1}{2}}(\eta)} \quad (3)$$

$$F_j(\eta_F) = \int_0^\infty \frac{x^j}{1+e^{x-\eta_F}} dx \quad (4)$$

where  $j$  is the Fermi integral of order,  $\eta_F$  and  $\hbar$  are reduced Fermi level ( $E_f/k_B T$ ) and Plank constant. By using the experimentally measured  $S$  and  $n$  in the above formula and assuming acoustic phonon scattering is prominent (*i.e.*,  $r = -1/2$ ), the theoretical transport properties can be calculated.

*Computational calculation:* First-principles calculations were performed based on density-functional theory (DFT) with all electron projected augmented wave (PAW) method, as implemented in the Vienna Ab initio Simulation Package (VASP) <sup>5-10</sup>. Semi-local generalized gradient approximation (GGA) with the fully relativistic Perdew-Burke-Ernzerhof (PBE) exchange correlation functional was employed <sup>11</sup>. The valence wave functions were expanded in a plan-wave basis with a cut-off energy of 400 eV. To simulate doping of Te, a  $1 \times 1 \times 3$  supercell containing 36 atoms was created, where one of the 12 Se atoms was substituted by one Te atom. All atoms were allowed to relax in their geometric optimizations, with the Brillouin zone sampled by a Monkhorst-Pack  $\mathbf{k}$ -mesh of  $2 \times 5 \times 4$  ( $4 \times 7 \times 6$  for self-consistent calculations). The convergence criterion was set to be  $1 \times 10^{-7}$  eV per electron and  $1 \times 10^{-3}$  eV·Å<sup>-1</sup> per unit cell. The Hubbard U model was included in non-self-consistent calculations, with the on-site coulombic (U) and the exchange (J) terms combined in a single effective U parameter of 5.8 eV for Ag\_4d orbitals, determined based on linear response theory <sup>12</sup>. Because Te is a heavy element, the spin-orbital coupling (SOC) effect was considered for the calculation of band structures, which is projected on the  $\mathbf{k}$ -path indicated by the AFLOW framework <sup>13,14</sup>.

For the calculations of (001) surface energy variation before and after Te-doping, the spin-polarized density functional theories (DFT) were performed by using the Vienna Ab initio Simulation Package (VASP) <sup>7</sup>. The Perdew-Burke-Ernzerhof generalized-gradient approximation functional was

used to describe the interaction between electrons <sup>11</sup>. The energy cutoff was set to 400 eV. The Monkhorst-Pack k-points were set to be  $6 \times 4 \times 1$  during the calculations. The vacuum region was set to be 15 Å in the z-direction to prevent the interaction between two adjacent surfaces. The energy convergence and atomic forces were set to  $10^{-5}$  eV and 0.02 eV/Å. The surface energy  $\gamma_s$ , is the energy required to cleave a surface from the bulk phase, which describes the stability of the surface. The  $\gamma_s$  is calculated by the below equation <sup>15</sup>:

$$\gamma_s = \frac{1}{2A}(E_{slab} - NE_{atom}) \quad (5)$$

Here  $A$  is the area of the surface.  $E_{slab}$  is the energy of the slab.  $N$  is the number of metal atoms.  $E_{atom}$  is the energy for one atom (Ag, Se, and Te) referred to the corresponding bulk structures.

For the calculations of (002) surface energy variation before and after Te-doping, the commercial software package Material Studio, including the Cambridge Serial Total Energy Package (CASTEP) module was used to conduct this geometric optimization to determine the initial lattice energy. In the process, the generalized-gradient approximation (GGA-PBE) along with OTFG ultrasoft pseudo potentials was used to perform the geometric optimization. The (002) surface was created in Material Studio software, the cleave rule is default and the vacuum thickness is 15Å.

**Debye Callaway model calculations:** Debye Callaway model is investigated to clarify the source of reduction in  $\kappa_l$  <sup>16</sup>:

$$\kappa_l = \frac{4\pi k_B^4 T^3}{\nu h^3} \int_0^{\theta_D} \tau_T \frac{\chi^4 \exp(\chi)}{[\exp(\chi)-1]^2} d\chi \quad (6)$$

here  $\nu$ ,  $\theta_D$ ,  $\gamma$ , and  $\tau_T$  stand for sound velocity, Debye temperature, reduced phonon frequency ( $\chi = \hbar\omega/k_B T$ ), and total phonon relaxation time.

The phonon-scattering phenomenon involves different scattering progressions from electron-phonon interaction ( $\tau_{EP}^{-1}$ ), dislocations ( $\tau_{DS}^{-1}$ ), impurity/point defects ( $\tau_{PD}^{-1}$ ), grains ( $\tau_{GB}^{-1}$ ), and Umklapp-

scattering ( $\tau_U^{-1}$ ), in the doped system. Hence,  $\tau_T$  for doped Ag<sub>2</sub>Se is demonstrated as <sup>17</sup>:

$$\frac{1}{\tau_T} = \frac{1}{\tau_U} + \frac{1}{\tau_N} + \frac{1}{\tau_{PD}} + \frac{1}{\tau_{DS}} + \frac{1}{\tau_{GB}} \quad (7)$$

where  $\tau_U$ ,  $\tau_N$ ,  $\tau_{PD}$ ,  $\tau_{IF}$ ,  $\tau_{NP}$ ,  $\tau_{DS}$ , and  $\tau_{SF}$  are relaxation time corresponding to the scattering from phonon-phonon U- and N-process (U+N), vacancies/alloy elements (point defects, PD), grain boundaries (GB), and dislocations (DS). As a result,  $\tau_T$  (the total phonon relaxation time) for the doped system shows a significant reduction as compared to  $\tau_T$  for the undoped Ag<sub>2</sub>Se system due to the existence of intense scattering effects under alloying or doping.

Further, Debye-Callaway model-based spectral lattice thermal conductivity  $\kappa_s$  was derived for doped samples to reveal the influence of all possible phonon scattering mechanisms, as follows <sup>18</sup>:

$$\kappa_S = \frac{4\pi k_B^4 T^3}{V_s h^3} \tau_T \frac{z^4 \exp(z)}{[\exp(z)-1]^2} \quad (8)$$

In the present doped system, the main  $\tau_T$  reduction is related to the phonon-scattering phenomenon from scattering due to impurity/point defects ( $\tau_{PD}^{-1}$ ), and grain boundaries ( $\tau_{GB}^{-1}$ ),

Hereafter, the phonon scattering from prominent scattering centers can be simplified as <sup>19</sup>:

$$\tau_{PD}^{-1} = \frac{V \Gamma}{4\pi v^3} \omega^4 \propto A \omega^4 \quad (9)$$

$$\tau_U^{-1} = \frac{\hbar \gamma^2 \omega^2 T}{M v^2 \theta_D} \exp\left(-\frac{\theta_D}{3T}\right) \propto B \omega^2 \quad (10)$$

$$\tau_{EP}^{-1} = \beta \tau_U^{-1} = \beta \frac{\hbar \gamma^2 \omega^2 T}{M v^2 \theta_D} \exp\left(-\frac{\theta_D}{3T}\right) \propto C \omega^2 \quad (11)$$

$$\tau_{DS}^{-1} = 0.6 B_D^2 N_D \omega \gamma^2 \left\{ \frac{1}{2} + \frac{1}{24} \left( \frac{1-2r}{1-r} \right)^2 \left[ 1 + \sqrt{2} \left( \frac{v_L}{v_T} \right) \right] \right\} + N_D \left( \frac{v^{-4/3}}{v_s^2} \right) \omega^3 \quad (12)$$

The simplified presentation of scattering phenomena via introducing pre-factors is described as follows:

$$\tau_U^{-1} + \tau_N^{-1} = Z_1 \omega^2 T \exp\left(-\frac{\theta_D}{3T}\right) \quad (13)$$

$$\tau_{PD}^{-1} = Z_2 \omega^4 \quad (14)$$

$$\tau_{DS}^{-1} = Z_3\omega^1 + Z_4\omega^3 \quad (15)$$

The proposed pre-factors  $Z_1$ ,  $Z_2$ ,  $Z_3$ , and  $Z_4$  correspond to the scattering from phonon-phonon U- and N-process, vacancies/anti-sites (point defects), and dislocation defects, respectively. The values of the average  $v$  is  $1462 \text{ ms}^{-1}$ , and the  $\theta_D$  is  $63.72 \text{ K}$ , both taken from the literature <sup>16</sup>.

## 2. Supplementary Figures

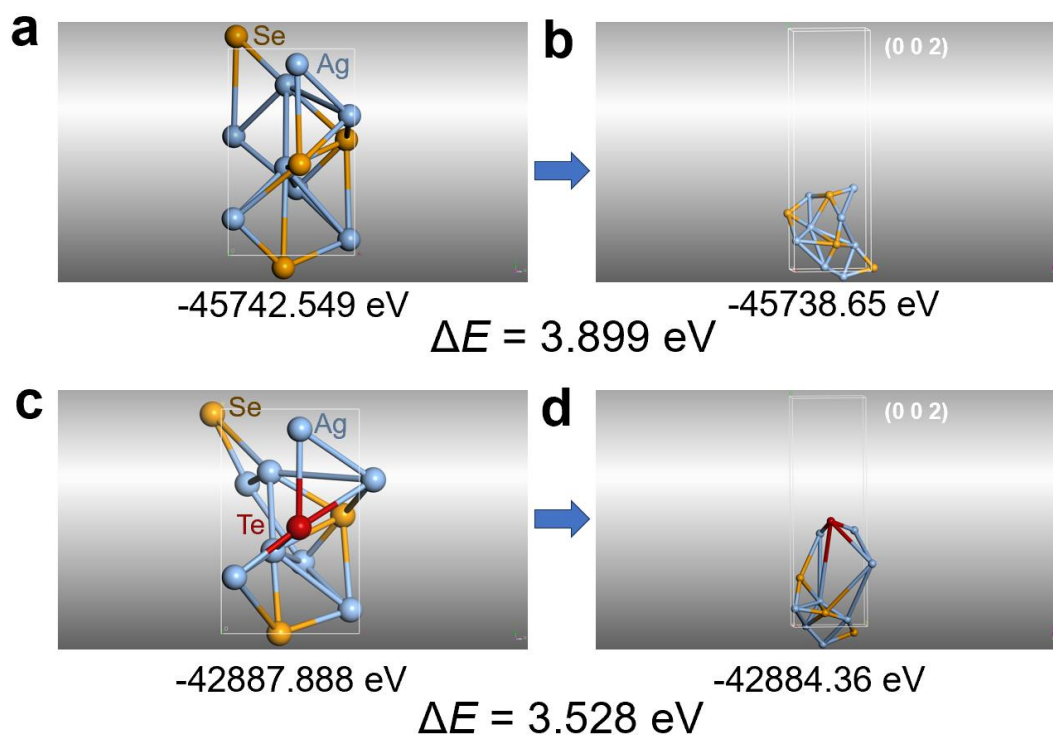

**Supplementary Fig. 1.** (a) Unit cell of pristine  $\text{Ag}_2\text{Se}$ . (b) Unit cell of pristine  $\text{Ag}_2\text{Se}$  cut along the (002) surface. The vacuum layer thickness is 15 Å. (c) Unit cell of Te-doped  $\text{Ag}_2\text{Se}$ . (d) Unit cell of Te-doped  $\text{Ag}_2\text{Se}$  cut along the (002) surface. The vacuum layer thickness is 15 Å. Here, the undoped  $\text{Ag}_2\text{Se}$  unit cell energy is -45742.549 eV, and the undoped  $\text{Ag}_2\text{Se}$  unit cell energy after cutting along the (002) crystal plane is -45738.65 eV, therefore the energy difference  $\Delta E = 3.899$  eV. Oppositely, the Te-doped  $\text{Ag}_2\text{Se}$  unit cell energy is -42887.888 eV, while the Te-doped  $\text{Ag}_2\text{Se}$  unit cell energy after cutting along the (002) crystal plane is -42884.36 eV, therefore the  $\Delta E = 3.528$  eV, which is smaller than 3.899 eV, indicating that the introduction of Te on Se sites is beneficial for the formation of the (002) surface of  $\text{Ag}_2\text{Se}$ .



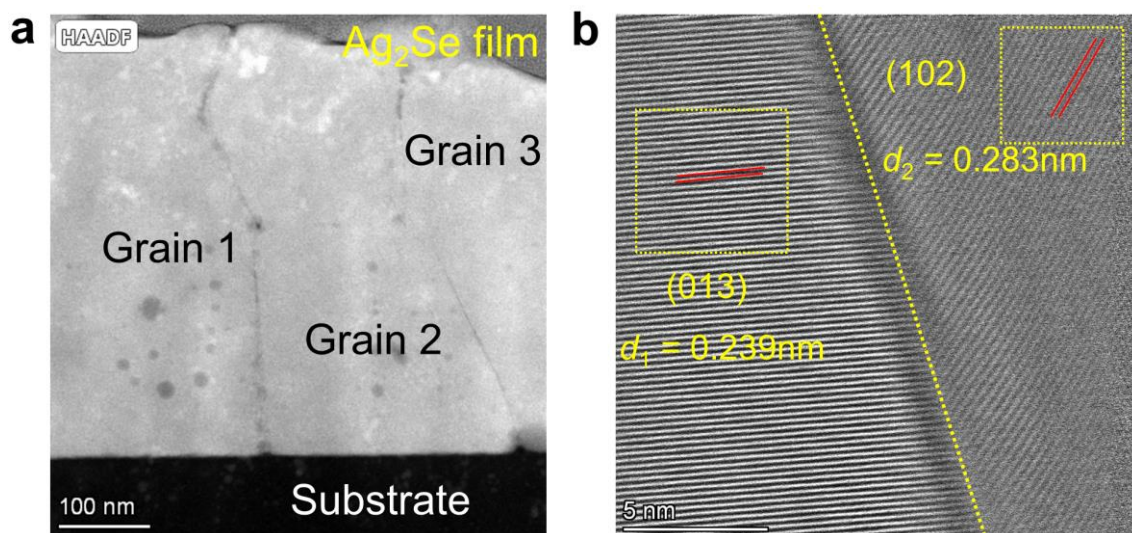

**Supplementary Fig. 2.** (a) Low-magnification transmission electron microscopy (TEM) high-angle annular dark field (HAADF) image of pristine Ag<sub>2</sub>Se thin film with anisotropic grains. (b) High-resolution TEM (HRTEM) image to show a grain boundary between two grains.

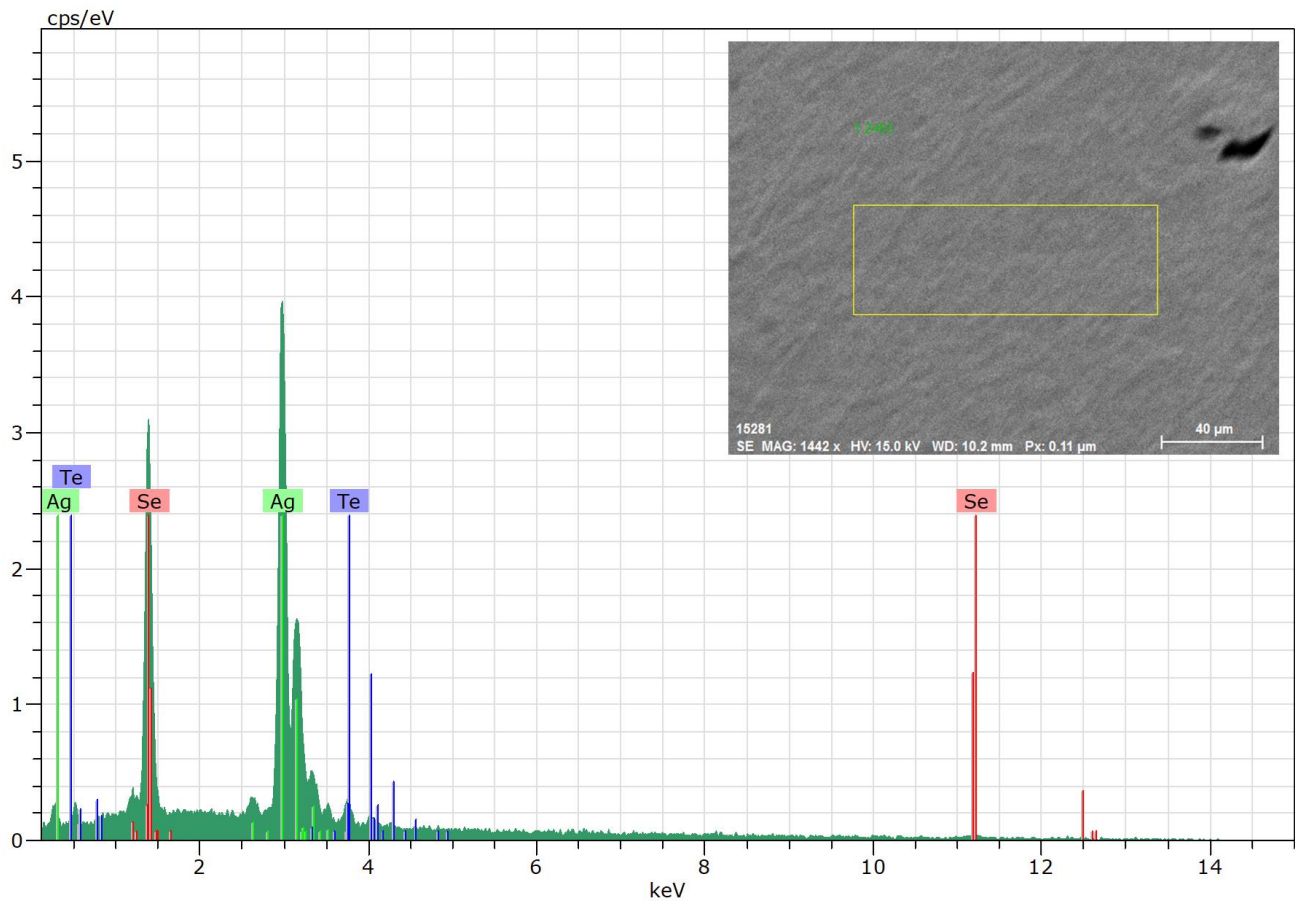

**Supplementary Fig. 3.** Energy dispersive spectroscopy (EDS) results with inset of scanning electron microscopy (SEM) image for  $\text{Ag}_2\text{Se}$  thin films with 0.7 at.% Te.

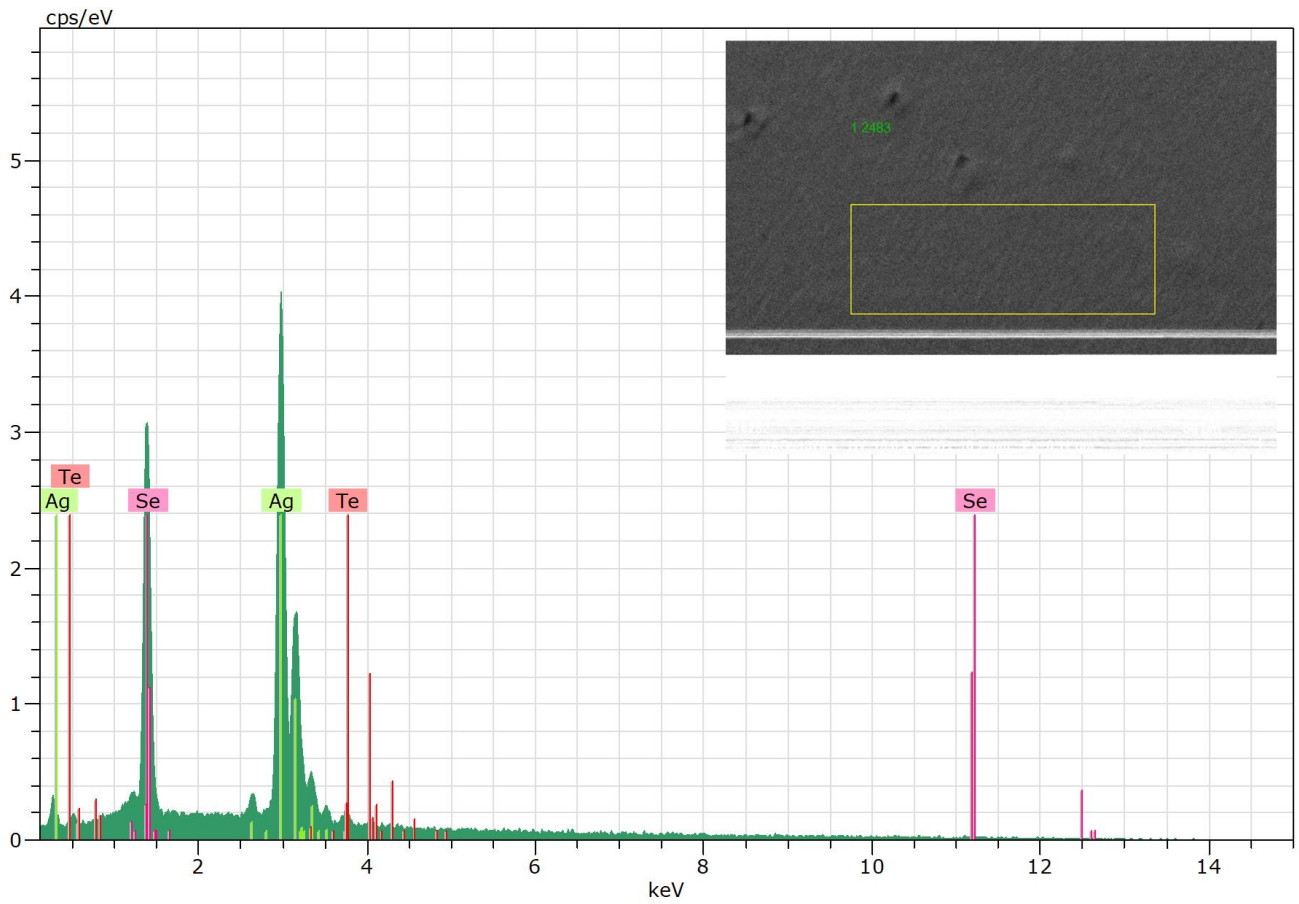

**Supplementary Fig.4.** EDS results with inset of SEM image for  $\text{Ag}_2\text{Se}$  thin films with 1.3 at.% Te.

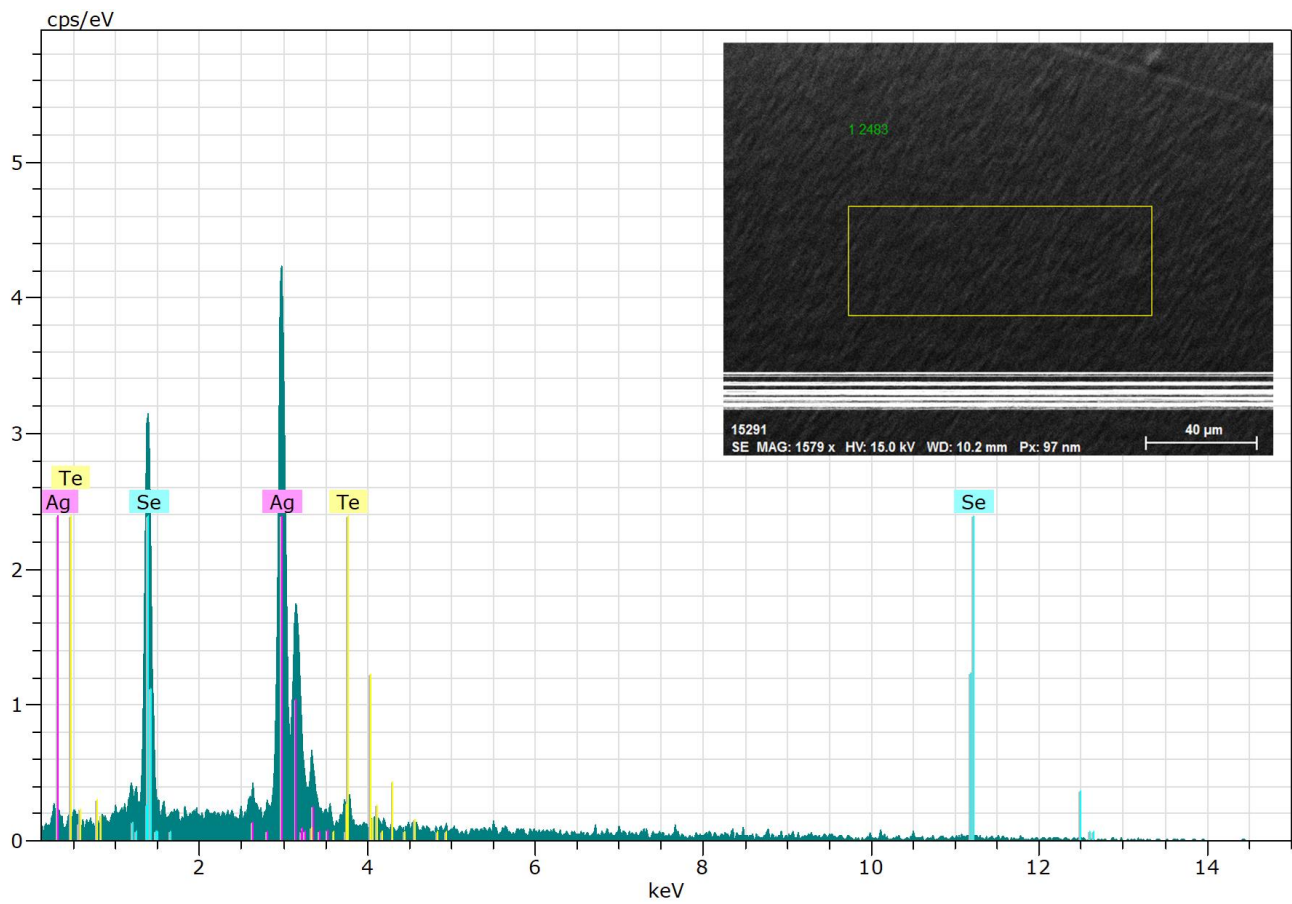

**Supplementary Fig. 5.** EDS results with inset of SEM image for  $\text{Ag}_2\text{Se}$  thin films with 1.9 at.% Te.

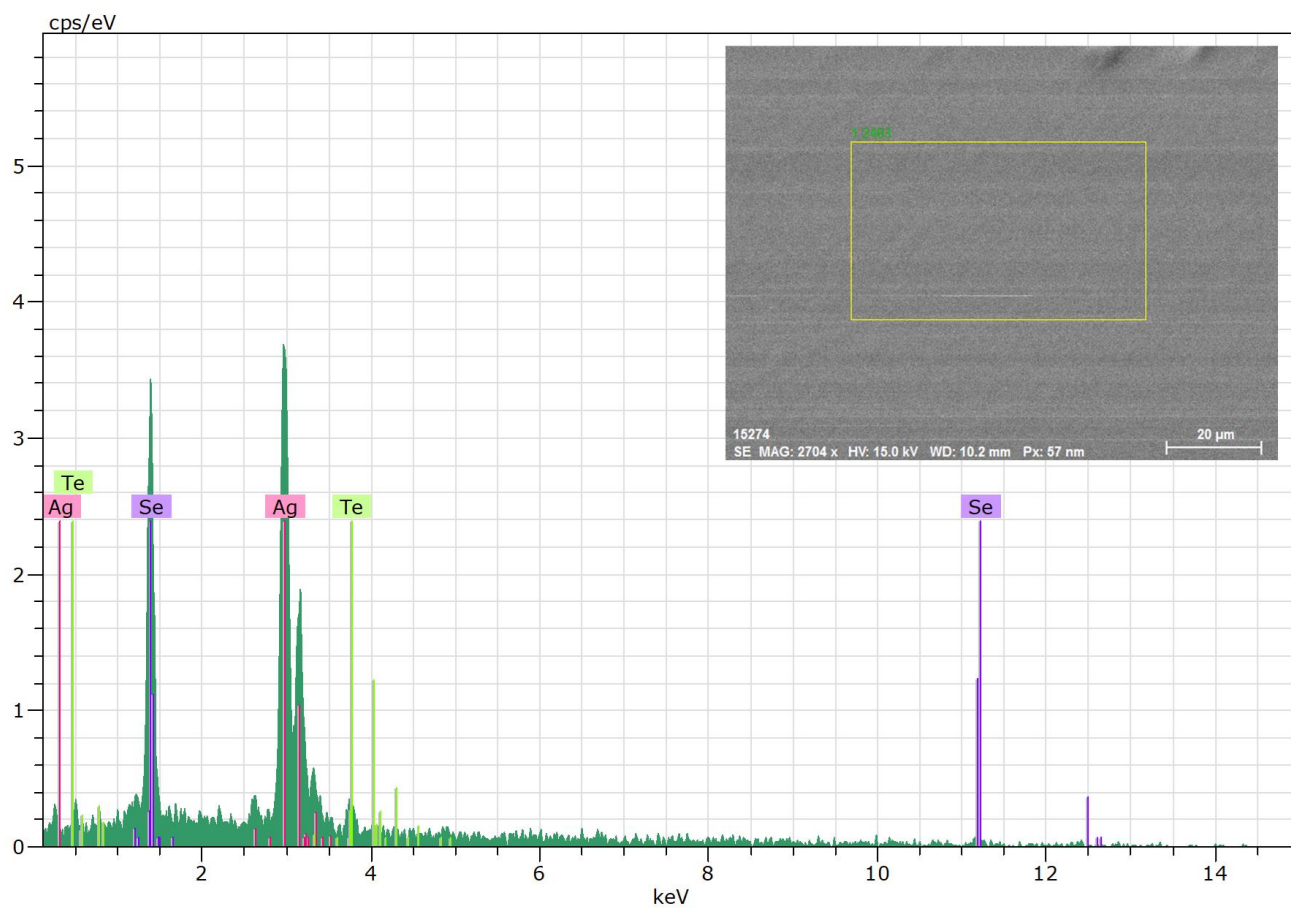

**Supplementary Fig. 6.** EDS results with inset of SEM image for  $\text{Ag}_2\text{Se}$  thin films with 2.6 at.% Te.

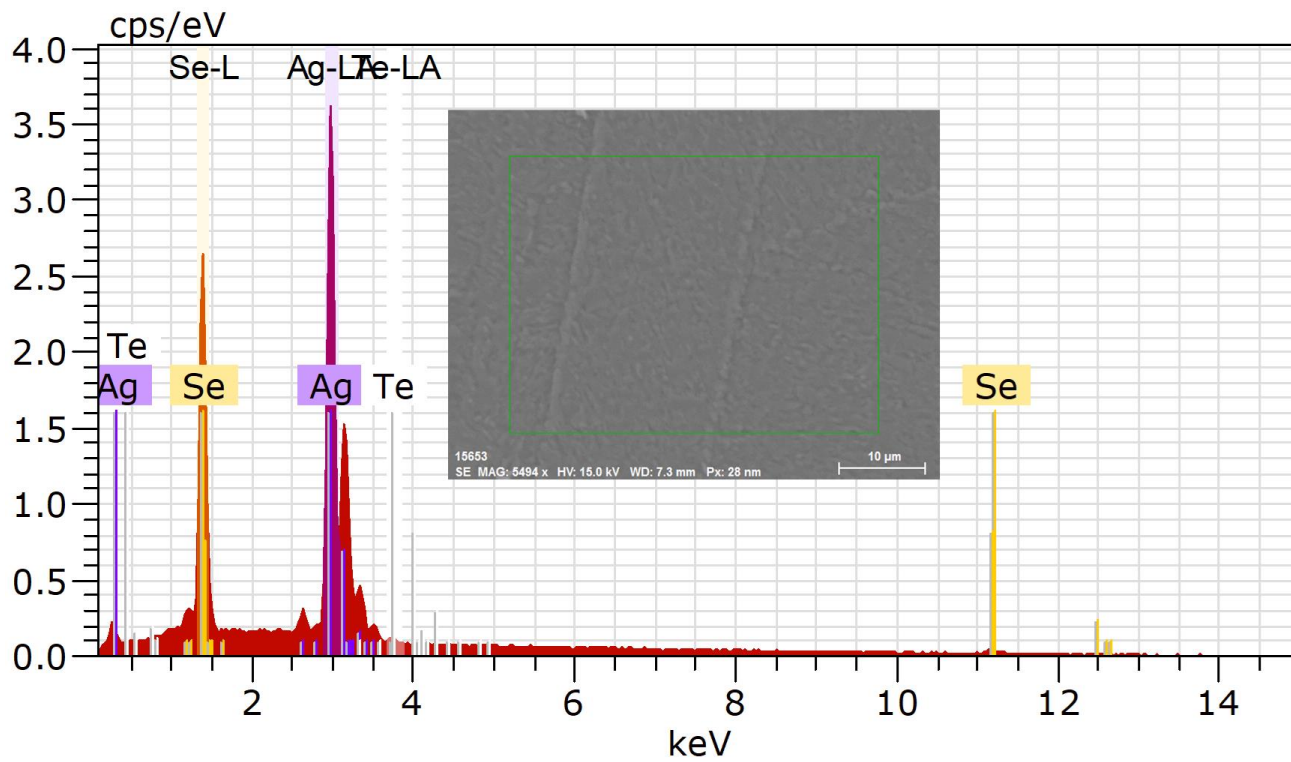

**Supplementary Fig. 7.** EDS results with inset of SEM image for  $\text{Ag}_2\text{Se}$  thin films with 3.8 at.% Te.



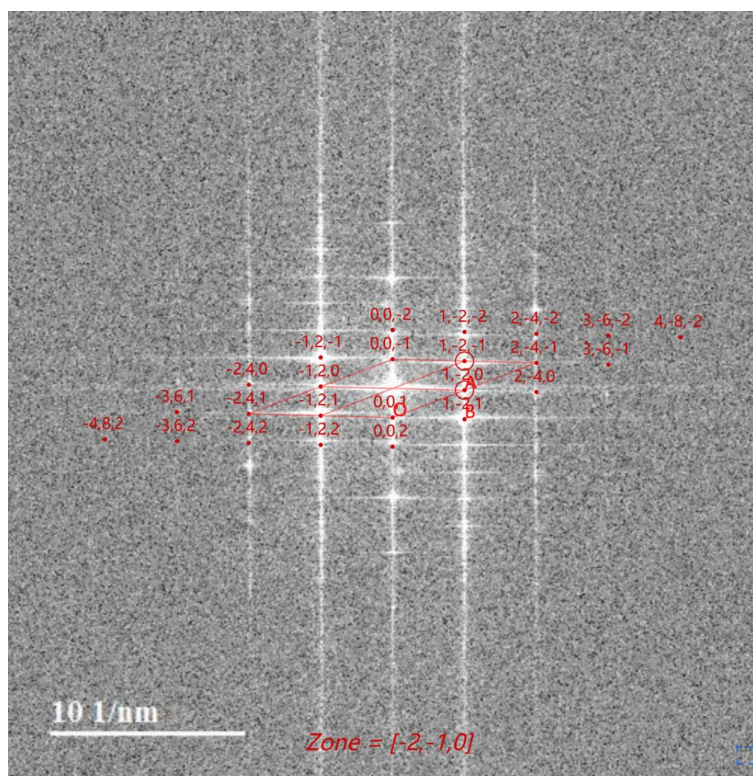

**Supplementary Fig. 8.** Magnified indexed fast Fourier transform (FFT) pattern taken from **Figure 3e** in the manuscript.

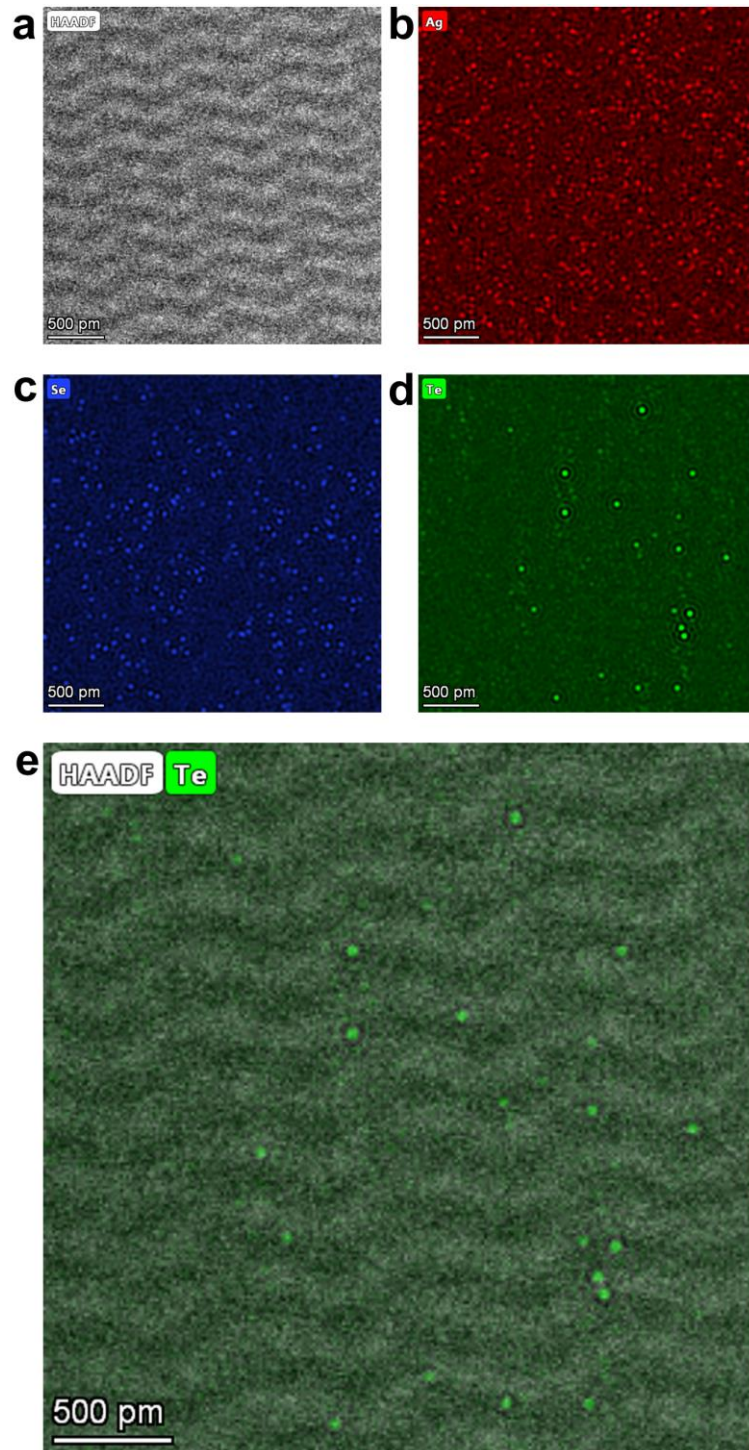

**Supplementary Fig. 9.** (a) Spherical aberration-corrected scanning TEM (Cs-STEM) HAADF image of Ag<sub>2</sub>Se thin film with 3.2 at.% Te, and corresponding EDS maps of (b) Ag, (c) Se, and (d) Te. (e) Overlap of the HAADF image and the EDS map of Te.



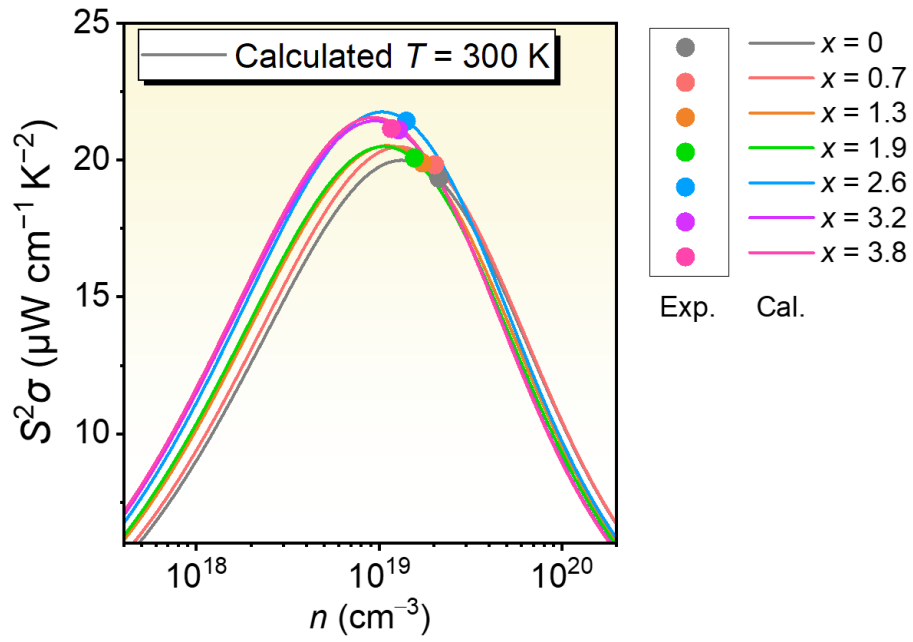

**Supplementary Fig. 10.** Comparison of calculated and experimental power factor  $S^2\sigma$  as a function of carrier concentration  $n$ . The calculated data are from the single parabolic band (SPB) model.

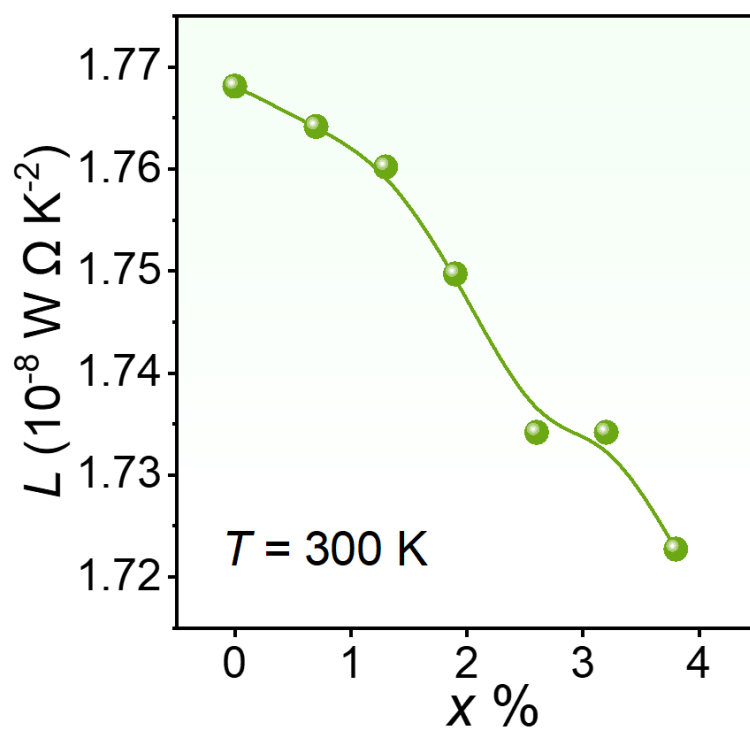

**Supplementary Fig. 11.** Te concentration  $x$ -dependent Lorenz number  $L$  at room temperature.

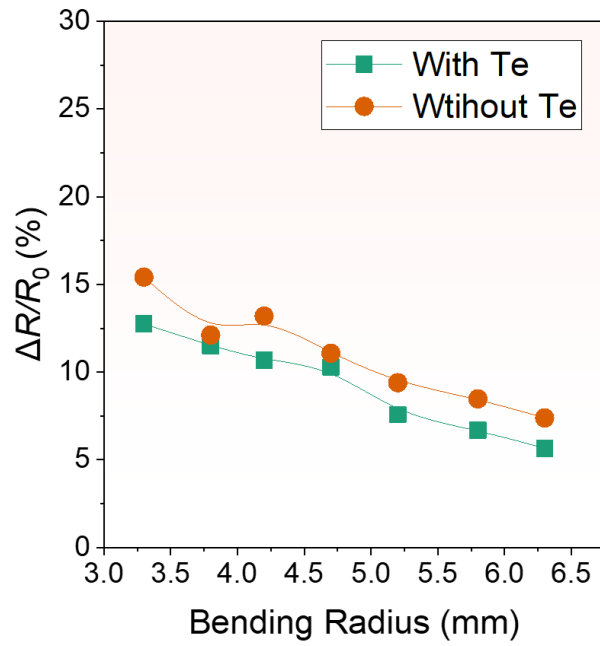

**Supplementary Fig. 12.** Measured increased normalized resistance  $\Delta R/R_0$  of the 3.2 at.% Te-doped and undoped  $\text{Ag}_2\text{Se}$  thin films at different bending radii.

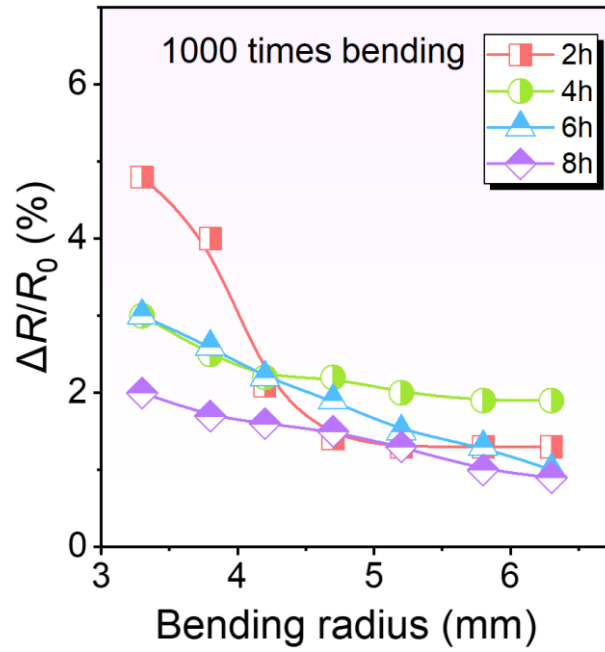

**Supplementary Fig. 13.** Measured increased normalized resistance  $\Delta R/R_0$  of the coated  $\text{Ag}_2\text{Se}$  thin films with 3.2 at.% Te at different bending radii and heating at 95 °C by different periods for 1000 times bending.

**Measurement method:** Transmission line measurement (TLM)

**Measurement tool:** 2400 Series Digital Source-meter

**Electrode:** 3 mm x 1.5 mm

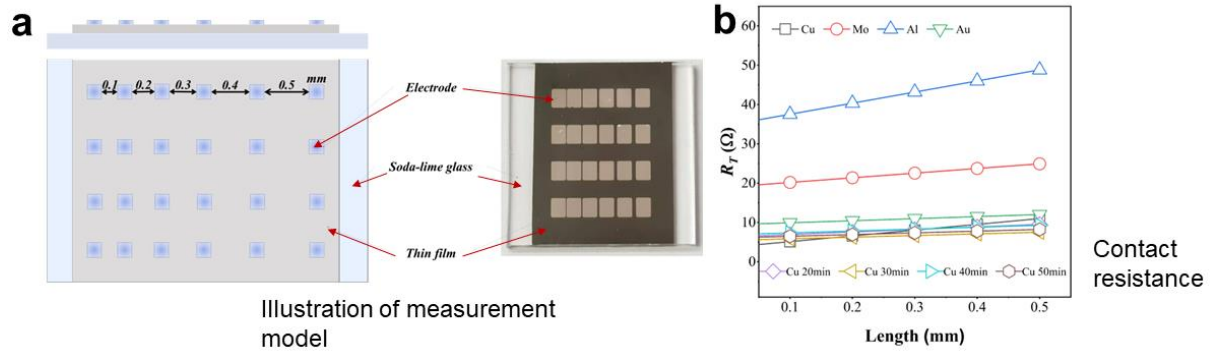

**Supplementary Fig. 14. (a)** Illustration of measurement model for evaluating the contact resistance.

Reproduced with permission <sup>20</sup>. Copyright 2022, Elsevier. **(b)** As-measured contact resistance as a

function of length for different electrode materials.

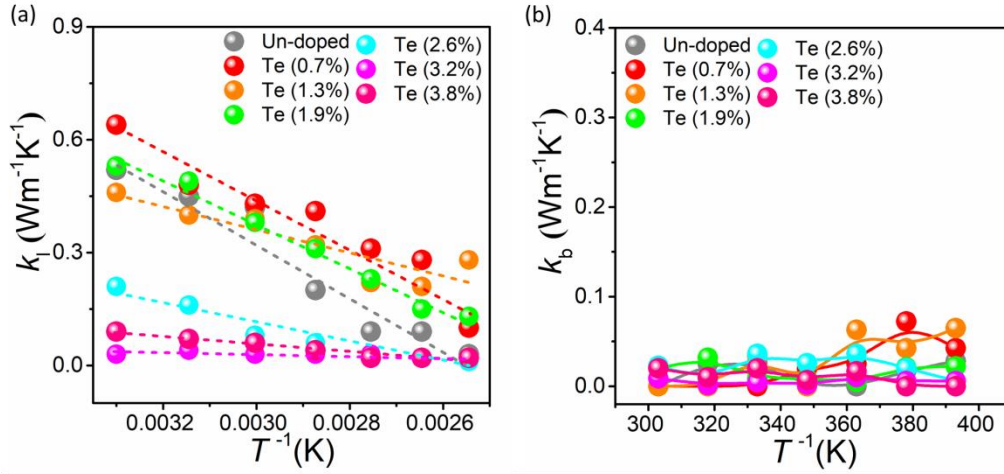

**Supplementary Fig. 15.** (a) The dotted line is linearly fitting to the lattice thermal conductivity ( $\kappa_l$ ) at low temperature. (b) Bipolar thermal conductivity ( $\kappa_b$ ) for Ag<sub>2</sub>Se thin films with different Te concentrations ( $x = 0, 0.7, 1.3, 1.9, 2.6, 3.2,$  and  $3.8$  at.%)

### 3. Supplementary Table

**Supplementary Table 1.** A summary of the thermoelectric performance of Ag<sub>2</sub>Se-based films. Here, poly(3,4-ethylenedioxythiophene) is abbreviated as PEDOT; polyvinylidene fluoride is abbreviated as PVDF; polyvinylpyrrolidone is abbreviated as PVP; single wall carbon nanotubes is abbreviated as SWCNTs; polypyrrole is abbreviated as PPy; polypropylene is abbreviated as PI; polyethylene naphthalate two formic acid glycol ester is abbreviated as PEN; and polyethylene terephthalate is abbreviated as PET.

| Materials                                     | Substrate      | ZT   | T (K) | S (μV K <sup>-1</sup> ) | σ (S cm <sup>-1</sup> ) | S <sup>2</sup> σ (μW cm <sup>-1</sup> K <sup>-2</sup> ) | κ (W m <sup>-1</sup> K <sup>-1</sup> ) | n (cm <sup>-3</sup> ) | μ (cm <sup>2</sup> V <sup>-1</sup> s <sup>-1</sup> ) | Year | Ref.          |
|-----------------------------------------------|----------------|------|-------|-------------------------|-------------------------|---------------------------------------------------------|----------------------------------------|-----------------------|------------------------------------------------------|------|---------------|
| Ag <sub>2</sub> Se thin film with 3.2 at.% Te | PI             | 1.27 | 363   | –132                    | 1425                    | 24.8                                                    | 0.71                                   | 1.28×10 <sup>19</sup> | 444                                                  | 2023 | This work     |
| Ag <sub>2</sub> Se                            | PI             | ~1.2 | 300   | –135                    | ~1440                   | ~25.9                                                   | ~0.66                                  | 6.5×10 <sup>18</sup>  | 1250                                                 | 2022 | <sup>21</sup> |
| Ag <sub>2</sub> Se+PVP                        | Nylon          | 1.1  | 300   | –144                    | 925                     | 19.1                                                    | /                                      | 7×10 <sup>18</sup>    | 1100                                                 | 2020 | <sup>22</sup> |
| Ag <sub>2</sub> Se                            | PI             | 1.1  | 300   | –161.7                  | 840                     | 22.05                                                   | 0.61                                   | 7.3×10 <sup>18</sup>  | 721.3                                                | 2022 | <sup>23</sup> |
| Printed-Ag <sub>2</sub> Se                    | PEN            | 1.03 | 300   | –185                    | 460                     | 17                                                      | 0.5                                    | /                     | /                                                    | 2020 | <sup>24</sup> |
| Ag <sub>2</sub> Se                            | Scaffold       | ~1   | 300   | –183                    | 472                     | 15.8                                                    | ~0.47                                  | /                     | /                                                    | 2020 | <sup>25</sup> |
| Ag <sub>2</sub> Se+Se+PPy                     | Nylon          | 0.94 | 300   | –144                    | 1064                    | 22.4                                                    | /                                      | 9.5×10 <sup>18</sup>  | 762                                                  | 2021 | <sup>26</sup> |
| Ag <sub>2</sub> Se+bacteria cellulose         | /              | 0.7  | 400   | –167                    | 230                     | 6.24                                                    | 0.36                                   | /                     | /                                                    | 2022 | <sup>27</sup> |
| Ag <sub>2</sub> Se+nylon                      | Substrate-free | 0.68 | 300   | –137.                   | 958.9                   | 18.25                                                   | /                                      | ~1.2×10 <sup>19</sup> | ~480                                                 | 2022 | <sup>28</sup> |

|                                  |                    |          |         |                |           |           |           |                         |          |          |               |
|----------------------------------|--------------------|----------|---------|----------------|-----------|-----------|-----------|-------------------------|----------|----------|---------------|
|                                  |                    |          |         | 9              |           |           |           |                         |          |          |               |
| Ag <sub>2</sub> Se               | Nylon              | 0.6      | 30<br>0 | –<br>141       | 497       | 9.87      | /         | $3.8 \times 10^1$<br>8  | 850      | 201<br>9 | <sup>29</sup> |
| Ag <sub>2.02</sub> Se            | PI                 | ~0.<br>6 | 34<br>8 | ~<br>110       | ~178<br>5 | 21.6      | ~1.2      | /                       | /        | 202<br>2 | <sup>30</sup> |
| Printed<br>film                  | Ag-Se<br>Glass     | 0.5<br>5 | 30<br>0 | –<br>220       | ~108      | ~5        | /         | /                       | /        | 202<br>0 | <sup>31</sup> |
| Ag <sub>2</sub> Se               | Substrat<br>e-free | 0.5      | 30<br>0 | –<br>120       | 1060      | ~15.<br>3 | ~0.8<br>9 | $4.79 \times 10$<br>18  | 139<br>0 | 202<br>3 | <sup>32</sup> |
| Ag <sub>2</sub> Se               | Glass              | /        | 37<br>6 | –<br>216       | 974       | ~46.<br>6 | /         | $1 \times 10^{19}$      | 634      | 201<br>7 | <sup>33</sup> |
| Ag <sub>2.2</sub> Se             | PI                 | /        | 30<br>0 | –<br>107       | 3010      | ~34.<br>2 | ~0.5<br>6 | $2.5 \times 10^1$<br>9  | 750      | 202<br>1 | <sup>34</sup> |
| Ag <sub>2.3</sub> Se             | Paper              | /        | 30<br>3 | –<br>122       | ~166<br>0 | ~24.<br>5 | /         | $2 \times 10^{19}$      | ~41<br>5 | 202<br>0 | <sup>35</sup> |
| Ag <sub>2</sub> Se+Ag+CuA<br>gSe | Nylon              | /        | 30<br>0 | –45            | 1050      | 22.3      | /         | $2.7 \times 10^2$<br>0  | 250      | 201<br>9 | <sup>36</sup> |
| Ag <sub>2</sub> Se               | PI                 | /        | 32<br>0 | –<br>142       | 1091      | 21.9      | /         | /                       | /        | 202<br>3 | <sup>37</sup> |
| Cu-doped Ag <sub>2</sub> Se      | PI                 | /        | 30<br>0 | –<br>125       | ~135<br>0 | 20.8      | /         | $8.6 \times 10^1$<br>8  | ~90<br>0 | 202<br>2 | <sup>38</sup> |
| S-doped Ag <sub>2</sub> Se       | PET                | /        | 30<br>0 | –<br>150       | ~900      | 20.5<br>8 | /         | $\sim 1 \times 10^{19}$ | ~57<br>0 | 202<br>3 | <sup>39</sup> |
| Ag <sub>2</sub> Se               | Nylon              | /        | 30<br>0 | –<br>150       | ~908      | 20.4<br>3 | /         | $5.82 \times 10$<br>18  | 127<br>7 | 202<br>2 | <sup>40</sup> |
| Ag <sub>2</sub> Se<br>+SWCNTs    | Nylon              | /        | 30<br>0 | –<br>108.<br>1 | ~165<br>7 | ~19.<br>4 | /         | $1.31 \times 10$<br>19  | /        | 202<br>3 | <sup>41</sup> |
| Ag <sub>1.8</sub> Se             | PI                 | /        | 38<br>0 | –<br>138       | 1000      | 19        | /         | $7.5 \times 10^1$<br>8  | 950      | 202<br>1 | <sup>42</sup> |
| Ag <sub>2</sub> Se               | Nylon              | /        | 30<br>0 | –<br>143       | ~920      | ~18.<br>8 | /         | $7.9 \times 10^1$<br>8  | 102<br>4 | 202<br>0 | <sup>16</sup> |
| Ag <sub>2</sub> Se+Ag            | Nylon              | /        | 30<br>0 | –<br>67.5      | 3958      | ~18.<br>6 | /         | $1.6 \times 10^2$<br>0  | ~83      | 202<br>1 | <sup>17</sup> |
| Ag <sub>2</sub> Se               | Glass              | /        | 30<br>0 | –<br>120       | ~120<br>0 | 17.3      | /         | $1 \times 10^{19}$      | 714      | 201<br>6 | <sup>18</sup> |



|                                          |       |   |     |       |       |       |       |                                |      |      |               |
|------------------------------------------|-------|---|-----|-------|-------|-------|-------|--------------------------------|------|------|---------------|
| Ag <sub>2</sub> Se+CuAgSe + PEDOT        | Nylon | / | 300 | –121  | ~1100 | 16    | ~0.46 | $7.4 \times 10^1$ <sup>8</sup> | 940  | 2020 | <sup>19</sup> |
| <i>In-situ</i> Ag <sub>2.09</sub> Se     | /     | / | 423 | –110  | ~1300 | 15.3  | /     | $1.5 \times 10^1$ <sup>9</sup> | 550  | 2022 | <sup>43</sup> |
| Ag <sub>2</sub> Se+Ag+PEDOT              | Nylon | / | 300 | –49.5 | ~5957 | 14.4  | /     | $4.4 \times 10^1$ <sup>9</sup> | 78   | 2021 | <sup>44</sup> |
| Ag <sub>2</sub> Se+SWCNTs                | Nylon | / | 397 | –118  | ~880  | ~12.4 | /     | $7.8 \times 10^1$ <sup>8</sup> | ~700 | 2021 | <sup>45</sup> |
| Ag <sub>1.98</sub> Ga <sub>0.02</sub> Se | Nylon | / | 300 | –115  | ~880  | ~11.6 | /     | /                              | /    | 2021 | <sup>46</sup> |
| Ag <sub>2</sub> Se                       | Glass | / | 300 | –123  | ~730  | 11    | /     | $4.8 \times 10^1$ <sup>9</sup> | 94   | 2021 | <sup>47</sup> |
| S-doped Ag <sub>2</sub> Se               | Nylon | / | 300 | –106  | 849   | ~9.5  | /     | $6 \times 10^{18}$             | ~900 | 2022 | <sup>48</sup> |
| Ag <sub>2</sub> Se+PEDOT                 | /     | / | 300 | –91   | 520   | ~4.3  | /     | /                              | /    | 2022 | <sup>49</sup> |
| Ag <sub>2</sub> Se+PVDF                  | Glass | / | 300 | –92   | ~370  | ~2.8  | /     | /                              | /    | 2020 | <sup>50</sup> |

**Supplementary Table 2.** Debye-Callaway model-based pre-factors for all Te-doped Ag<sub>2</sub>Se samples.

| <b>Parameters</b>                   | <b>Samples</b> |       |       |       |       |       |       |
|-------------------------------------|----------------|-------|-------|-------|-------|-------|-------|
| $x$                                 | 0              | 0.1   | 0.2   | 0.3   | 0.4   | 0.5   | 0.5   |
| $A_1$ ( $10^{-41}$ s <sup>3</sup> ) | 0.005          | 0.61  | 0.56  | 0.77  | 18.32 | 41.17 | 55.51 |
| $A_2$ ( $10^{-18}$ s/K)             | 4.71           | 0.21  | 0.29  | 0.47  | 17.60 | 50.14 | 44.50 |
| $A_3$ ( $10^{-15}$ s)               | 6.44           | 6.44  | 6.44  | 6.44  | 6.44  | 6.44  | 6.44  |
| $A_4$ ( $10^{-25}$ s <sup>2</sup> ) | 0.0            | 0.002 | 0.002 | 0.004 | 0.021 | 0.029 | 0.032 |
| $d$ (nm)                            | ----           | 300   | 270   | 220   | 180   | 160   | 178   |

**Supplementary Table 3.** A summary and comparison of the power densities of reported thermoelectric flexible devices.

| <b>Device materials</b>                                                                           | <b>Output power density (mW cm<sup>-2</sup>)</b> |
|---------------------------------------------------------------------------------------------------|--------------------------------------------------|
| Cu <sub>3</sub> Se <sub>1</sub> single leg <sup>51</sup>                                          | ~0.09 ( $\Delta T = 30$ °C)                      |
| N-Bi <sub>2</sub> Te <sub>3</sub> +P-Sb <sub>2</sub> Te <sub>3</sub> <sup>52</sup>                | ~0.1 ( $\Delta T = 20$ °C)                       |
| N-Bi <sub>2</sub> Te <sub>3</sub> (PEDOT:PSS)+P-Sb <sub>2</sub> Te <sub>3</sub> (PEDOT:PSS)<br>53 | ~0.2 ( $\Delta T = 20$ °C)                       |
| Bi <sub>2</sub> Te <sub>3</sub> with 1 wt% Se single leg <sup>54</sup>                            | ~0.14 ( $\Delta T = 20$ °C)                      |
| P-Sb + N-Ni <sup>55</sup>                                                                         | ~0.9 ( $\Delta T = 20$ °C)                       |
| N-Bi <sub>2</sub> Te <sub>3</sub> +P-Sb <sub>2</sub> Te <sub>3</sub> <sup>56</sup>                | ~1.42 ( $\Delta T = 60$ °C)                      |
| Ag <sub>2</sub> Se single leg <sup>36</sup>                                                       | ~0.16 ( $\Delta T = 20$ °C)                      |
| Ag <sub>2</sub> Se single leg <sup>29</sup>                                                       | ~0.23 ( $\Delta T = 30$ °C)                      |
| Ag <sub>2</sub> Se single leg <sup>21</sup>                                                       | ~1.0 ( $\Delta T = 20$ °C)                       |
| Ag <sub>2</sub> Se single leg <sup>38</sup>                                                       | ~1.4 ( $\Delta T = 20$ °C)                       |
| This work                                                                                         | 1.5 ( $\Delta T = 20$ °C)                        |

**Supplementary Table 4.** A summary of reported surface energies of other materials.

| <b>Materials</b>                                                                            | <b>Surface Energy (<math>\text{J m}^{-2}</math>)</b>               |
|---------------------------------------------------------------------------------------------|--------------------------------------------------------------------|
| $\text{Mg}_2\text{Si}$ (100) <sup>57</sup>                                                  | 0.8-2.0                                                            |
| $\text{Al}_3\text{Ti}$ (010) <sup>58</sup>                                                  | 1.798                                                              |
| $\text{Al}_3\text{Ti}$ (001) <sup>58</sup>                                                  | 2.374/1.167                                                        |
| Boron Carbide Polytype $\text{B}_{11}\text{C}_p(\text{CBC})$ ( $10\bar{1}1$ ) <sup>59</sup> | 3.21                                                               |
| Co (0001) <sup>60</sup>                                                                     | 2.110                                                              |
| $\text{Co}_3\text{Cr}$ (0001) <sup>60</sup>                                                 | 2.170                                                              |
| $\text{Co}_3\text{Mn}$ (0001) <sup>60</sup>                                                 | 2.766                                                              |
| $\text{Co}_3\text{Ni}$ (0001) <sup>60</sup>                                                 | 2.012                                                              |
| $\text{CoSb}_3$ (100) <sup>61</sup>                                                         | 0.330                                                              |
| $\text{CoSb}_3$ (110) <sup>61</sup>                                                         | 0.138                                                              |
| $\text{CoSb}_3$ (111) <sup>61</sup>                                                         | 0.797                                                              |
| $\text{Ni}_3\text{Nb}$ (100) <sup>62</sup>                                                  | 2.51                                                               |
| $\text{Ti}_2\text{AlC}$ (0001) <sup>63</sup>                                                | 0.078                                                              |
| This work $\text{Ag}_2\text{Se}$ (001)                                                      | 0.032-0.064<br>(0.002 eV/Å <sup>2</sup> -0.004 eV/Å <sup>2</sup> ) |

## References (Supplementary Information)

1. Xu, Y. et al. Performance optimization and single parabolic band behavior of thermoelectric MnTe. *J. Mater. Chem. A* **5**, 19143-19150 (2017).
2. Shen, J., Chen, Z., Zheng, L., Li, W. & Pei, Y. Single parabolic band behavior of thermoelectric *p*-type CuGaTe<sub>2</sub>. *J. Mater. Chem. C* **4**, 209-214 (2016).
3. She, X. et al. High thermoelectric performance of higher manganese silicides prepared by ultra-fast thermal explosion. *J. Mater. Chem. C* **3**, 12116-12122 (2015).
4. Liu, W. et al. Ag Doping Induced Abnormal Lattice Thermal Conductivity in Cu<sub>2</sub>Se. *J. Mater. Chem. C* **6**, 13225-13231 (2018).
5. Kresse, G.Hafner, J. *Ab initio* molecular-dynamics simulation of the liquid-metal-amorphous-semiconductor transition in germanium. *Phys. Rev. B* **49**, 14251-14269 (1994).
6. Kresse, G.Hafner, J. *Ab initio* molecular dynamics for liquid metals. *Phys. Rev. B* **47**, 558-561 (1993).
7. Kresse, G.Furthmüller, J. Efficiency of *ab-initio* total energy calculations for metals and semiconductors using a plane-wave basis set. *Comp. Mater. Sci.* **6**, 15-50 (1996).
8. Kresse, G.Hafner, J. Norm-conserving and ultrasoft pseudopotentials for first-row and transition elements. *J. Phys. Condens. Mat.* **6**, 8245-8257 (1994).
9. Kresse, G.Furthmüller, J. Efficient iterative schemes for *ab initio* total-energy calculations using a plane-wave basis set. *Phys. Rev. B* **54**, 11169-11186 (1996).
10. Kresse, G.Joubert, D. From ultrasoft pseudopotentials to the projector augmented-wave method. *Phys. Rev. B* **59**, 1758-1775 (1999).
11. Perdew, J.P., Burke, K. & Ernzerhof, M. Generalized Gradient Approximation Made Simple. *Phys. Rev. Lett.* **77**, 3865-3868 (1996).

12. Cococcioni, M.de Gironcoli, S. Linear response approach to the calculation of the effective interaction parameters in the LDA + U method. *Phys. Rev. B* **71**, 035105 (2005).
13. Setyawan, W.Curtarolo, S. High-throughput electronic band structure calculations: Challenges and tools. *Comp. Mater. Sci.* **49**, 299-312 (2010).
14. Tran, F.Blaho, P. Accurate Band Gaps of Semiconductors and Insulators with a Semilocal Exchange-Correlation Potential. *Phys. Rev. Lett.* **102**, 226401 (2009).
15. Andrés, J., Gracia, L., Gouveia, A.F., Ferrer, M.M. & Longo, E. Effects of surface stability on the morphological transformation of metals and metal oxides as investigated by first-principles calculations. *Nanotechnology* **26**, 405703 (2015).
16. Jiang, C. et al. Ultrahigh Performance of *n*-Type Ag<sub>2</sub>Se Films for Flexible Thermoelectric Power Generators. *ACS Appl. Mater. Interfaces* **12**, 9646-9655 (2020).
17. Gao, Q. et al. High Power Factor Ag/Ag<sub>2</sub>Se Composite Films for Flexible Thermoelectric Generators. *ACS Appl. Mater. Interfaces* **13**, 14327-14333 (2021).
18. Zhou, K. et al. Non-epitaxial pulsed laser deposition of Ag<sub>2</sub>Se thermoelectric thin films for near-room temperature applications. *Ceram. Int.* **42**, 12490-12495 (2016).
19. Lu, Y. et al. Ultrahigh performance PEDOT/Ag<sub>2</sub>Se/CuAgSe composite film for wearable thermoelectric power generators. *Mater. Today Phys.* **14**, 100223 (2020).
20. Zheng, Z.-H. et al. Realizing high thermoelectric performance in highly (010)-textured flexible Cu<sub>2</sub>Se thin film for wearable energy harvesting. *Mater. Today Phys.* **24**, 100659 (2022).
21. Lei, Y. et al. Microstructurally Tailored Thin  $\beta$ -Ag<sub>2</sub>Se Films towards Commercial Flexible Thermoelectrics. *Adv. Mater.* **34**, 2104786 (2021).
22. Jiang, C. et al. Ultrahigh performance polyvinylpyrrolidone/Ag<sub>2</sub>Se composite thermoelectric film for flexible energy harvesting. *Nano Energy* **80**, 105488 (2021).
23. Saeidi-Javash, M. et al. Machine learning-assisted ultrafast flash sintering of high-performance

- and flexible silver–selenide thermoelectric devices. *Energy Environ. Sci.* **15**, 5093-5104 (2022).
24. Mallick, M.M. et al. New frontier in printed thermoelectrics: formation of  $\beta$ -Ag<sub>2</sub>Se through thermally stimulated dissociative adsorption leads to high *ZT*. *J. Mater. Chem. A* **8**, 16366-16375 (2020).
25. Mallick, M.M., Franke, L., Rösch, A.G. & Lemmer, U. Shape-Versatile 3D Thermoelectric Generators by Additive Manufacturing. *ACS Energy Lett.* **6**, 85-91 (2021).
26. Li, Y. et al. Exceptionally High Power Factor Ag<sub>2</sub>Se/Se/Polypyrrole Composite Films for Flexible Thermoelectric Generators. *Adv. Funct. Mater.* **32**, 2106902 (2022).
27. Palaporn, D., Mongkolthananaruk, W., Faungnawakij, K., Kurosaki, K. & Pinitsoontorn, S. Flexible Thermoelectric Paper and Its Thermoelectric Generator from Bacterial Cellulose/Ag<sub>2</sub>Se Nanocomposites. *ACS Appl. Energy Mater.* **5**, 3489-3501 (2022).
28. Yang, Z.-y. et al. Ag<sub>2</sub>Se/nylon self-supporting composite films for wearable photo-thermoelectric generators with high output characteristics. *J. Mater. Chem. A* **10**, 21080-21092 (2022).
29. Ding, Y. et al. High Performance n-Type Ag<sub>2</sub>Se Film on Nylon Membrane for Flexible Thermoelectric Power Generator. *Nat. Commun.* **10**, 841 (2019).
30. Zheng, Z.-H. et al. Significantly (001)-textured Ag<sub>2</sub>Se thin films with excellent thermoelectric performance for flexible power applications. *J. Mater. Chem. A* **10**, 21603-21610 (2022).
31. Mallick, M.M. et al. High-Performance Ag–Se-Based n-Type Printed Thermoelectric Materials for High Power Density Folded Generators. *ACS Appl. Mater. Interfaces* **12**, 19655-19663 (2020).
32. Lee, D. et al. Substrate-Free Thermoelectric 25  $\mu$ m-Thick Ag<sub>2</sub>Se Films with High Flexibility and In-Plane *zT* of 0.5 at Room Temperature. *ACS Appl. Mater. Interfaces* **15**, 3047-3053 (2023).
33. Perez-Taborda, J.A., Caballero-Calero, O., Vera-Londono, L., Briones, F. & Martin-Gonzalez, M. High Thermoelectric *zT* in n-Type Silver Selenide films at Room Temperature. *Adv. Energy Mater.* **8**, 1702024 (2018).

34. Manzano, C.V., Llorente del Olmo, C., Caballero-Calero, O. & Martín González, M. High thermoelectric efficiency in electrodeposited silver selenide films: from Pourbaix diagram to a flexible thermoelectric module. *Sustain. Energy Fuels* **5**, 4597-4605 (2021).
35. Gao, J. et al. Thermoelectric Flexible Silver Selenide Films: Compositional and Length Optimization. *iScience* **23**, 100753 (2020).
36. Lu, Y. et al. Ultrahigh power factor and flexible silver selenide-based composite film for thermoelectric devices. *Energy Environ. Sci.* **13**, 1240-1249 (2020).
37. Sarkar, P. et al. Improved Power Factor in Highly Textured n-Type Ag<sub>2</sub>Se Flexible Films. *ACS Appl. Electron. Mater.* **5**, 1650-1659 (2023).
38. Hou, S. et al. High-performance, thin-film thermoelectric generator with self-healing ability for body-heat harvesting. *Cell Rep. Phys. Sci.* **3**, 101146 (2022).
39. Xin, C. et al. Solution-Processed Flexible n-Type S-Doped Ag<sub>2</sub>Se Thermoelectric Generators for Near-Ambient-Temperature Energy Harvest. *Mater. Today Energy* **33**, 101266 (2023).
40. Liu, Y. et al. High performance Ag<sub>2</sub>Se films by a one-pot method for a flexible thermoelectric generator. *J. Mater. Chem. A* **10**, 25644-25651 (2022).
41. Hu, Q.-X. et al. SWCNTs/Ag<sub>2</sub>Se film with superior bending resistance and enhanced thermoelectric performance *via in situ* compositing. *Chem. Eng. J.* **457**, 141024 (2023).
42. Hou, S. et al. High performance wearable thermoelectric generators using Ag<sub>2</sub>Se films with large carrier mobility. *Nano Energy* **87**, 106223 (2021).
43. Niu, J. et al. *In-situ* growth of high room temperature thermoelectric performance Ag<sub>2</sub>Se thin films. *Mater. Lett.* **312**, 131662 (2022).
44. Wang, Z. et al. High performance Ag<sub>2</sub>Se/Ag/PEDOT composite films for wearable thermoelectric power generators. *Mater. Today Phys.* **21**, 100553 (2021).
45. Geng, J. et al. High Power Factor n-Type Ag<sub>2</sub>Se/SWCNTs Hybrid Film for Flexible



Thermoelectric Generator. *J. Phys. D Appl. Phys.* **54**, 434004 (2021).

46. Lu, Y., Liu, Y., Li, Y. & Cai, K. The influence of Ga doping on preparation and thermoelectric properties of flexible Ag<sub>2</sub>Se films. *Compos. Commun.* **27**, 100895 (2021).

47. Jindal, S., Singh, S., Saini, G.S.S. & Tripathi, S.K. Optimization of thermoelectric power factor of (013)-oriented Ag<sub>2</sub>Se films *via* thermal annealing. *Mater. Res. Bull.* **145**, 111525 (2022).

48. Wu, M. et al. Ultraflexible and High-Thermoelectric-Performance Sulfur-Doped Ag<sub>2</sub>Se Film on Nylon for Power Generators. *ACS Appl. Mater. Interfaces* **14**, 4307-4315 (2022).

49. Park, D., Lee, S. & Kim, J. Thermoelectric and mechanical properties of PEDOT:PSS-coated Ag<sub>2</sub>Se nanowire composite fabricated *via* digital light processing based 3D printing. *Compos. Commun.* **30**, 101084 (2022).

50. Park, D., Ju, H. & Kim, J. Enhanced thermoelectric properties of flexible N-type Ag<sub>2</sub>Se nanowire/polyvinylidene fluoride composite films synthesized *via* solution mixing. *J. Ind. Eng. Chem.* **93**, 333-338 (2021).

51. Lu, Y. et al. Good Performance and Flexible PEDOT:PSS/Cu<sub>2</sub>Se Nanowire Thermoelectric Composite Films. *ACS Appl. Mater. Interfaces* **11**, 12819-12829 (2019).

52. Yu, Y. et al. Towards high integration and power density: Zigzag-type thin-film thermoelectric generator assisted by rapid pulse laser patterning technique. *Appl. Energ.* **275**, 115404 (2020).

53. We, J.H., Kim, S.J. & Cho, B.J. Hybrid Composite of Screen-Printed Inorganic Thermoelectric Film and Organic Conducting Polymer for Flexible Thermoelectric Power Generator. *Energy* **73**, 506-512 (2014).

54. Madan, D. et al. Enhanced Performance of Dispenser Printed MA n-type Bi<sub>2</sub>Te<sub>3</sub> Composite Thermoelectric Generators. *ACS Appl. Mater. Interfaces* **4**, 6117-6124 (2012).

55. Cao, J. et al. Flexible elemental thermoelectrics with ultra-high power density. *Mater. Today Energy* **25**, 100964 (2022).

56. Ao, D.-W. et al. Assembly-Free Fabrication of High-Performance Flexible Inorganic Thin-Film Thermoelectric Device Prepared by a Thermal Diffusion. *Adv. Energy Mater.* **12**, 2202731 (2022).
57. Liao, J.N., Li, K., Wang, F., Zeng, X.S. & Zhou, N.G. Properties of Mg<sub>2</sub>Si (100) surfaces: A first-principles study. *Solid State Commun.* **183**, 41-46 (2014).
58. Qin, J. Partition the total energy of Al<sub>3</sub>Ti to characterize the Al<sub>3</sub>Ti/Al interface properties: a first-principles study. *Surf. Sci.* **739**, 122398 (2024).
59. Beaudet, T.D., Smith, J.R. & Adams, J.W. Surface energy and relaxation in boron carbide (10Π) from first principles. *Solid State Commun.* **219**, 43-47 (2015).
60. Cao, Y., Lin, Q., Huang, Q., Xu, Y. & Zhou, S. First-principles predictions of corrosion resistance of (0001) surface of Co and Co<sub>3</sub>X (X = Cr, Ni, Mn) compounds. *Computational and Theoretical Chemistry* **1225**, 114171 (2023).
61. Hammerschmidt, L., Quennet, M., Töpfer, K. & Paulus, B. Low-index surfaces of CoSb<sub>3</sub> skutterudites from first principles. *Surf. Sci.* **637-638**, 124-131 (2015).
62. Hao, L., Chen, W., Lei, X., Yao, W. & Wang, N. Structures, Energies, and Electronic Properties of Low-Index Surfaces of γ"-Ni<sub>3</sub>Nb: A First-Principles Calculations. *physica status solidi (b)* **260**, 2300239 (2023).
63. Liu, P. et al. A systematic investigation on the surface properties of Ti<sub>2</sub>AlC via first-principles calculations. *Surf. Sci.* **735**, 122337 (2023).
